# Supplementary material
Source: Springer Nature journal article supplement (https://www.springermedizin.de/resource/supplementary/12958_2008_472_MOESM5_ESM.pdf/9567982)

E0 (Estrous)

Day 21 (Gestation)

Anti-sense

Sense

Anti-sense

Sense

MMP-2

Epithelium

MMP-2

CAR

conceptus

ICAR

stroma

MMP-9

MMP-9

CAR

conceptus

20 μm

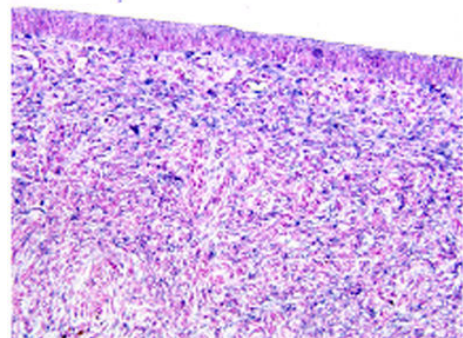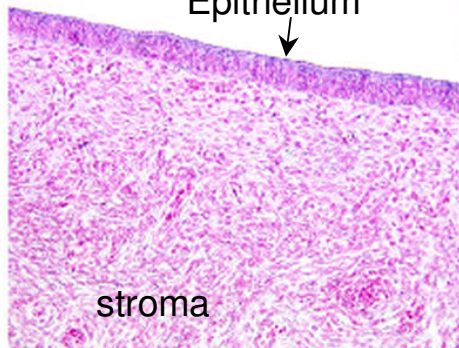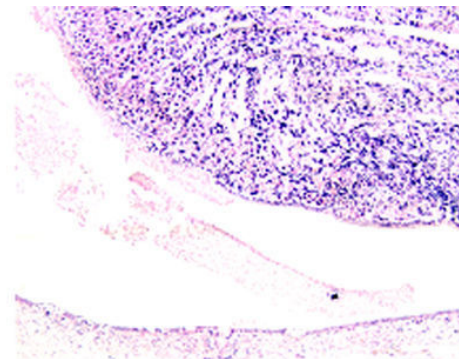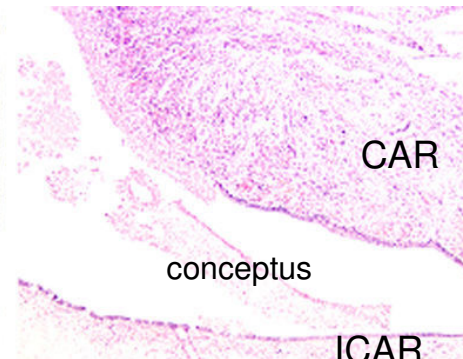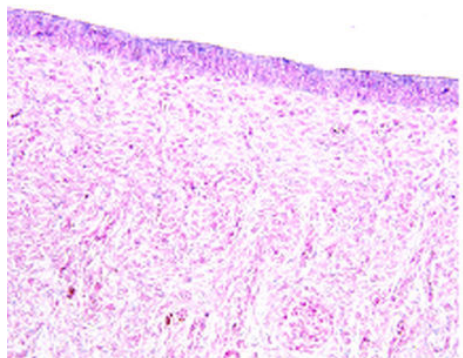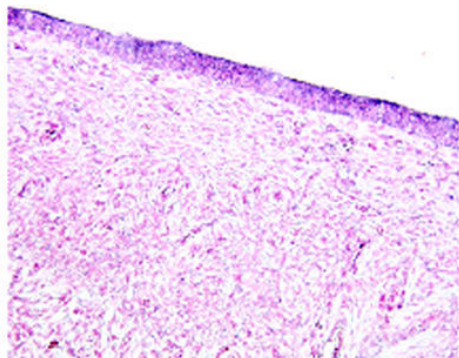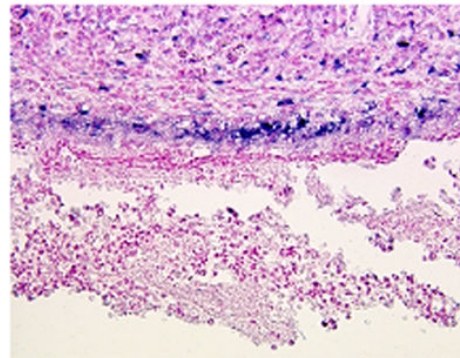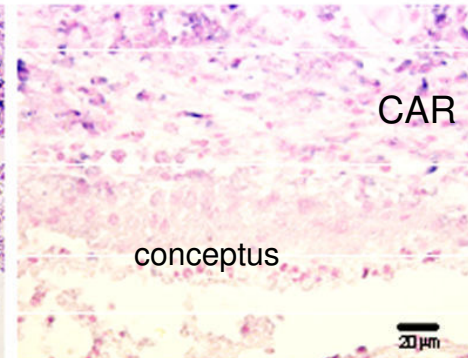

Supplement: MOESM5 [file 9567982]
